# Supplementary material for: Phenotype and Reactivity of Lymphocytes Expanded from Benign Prostate Hyperplasic Tissues and Prostate Cancer
Source: MDPI journal article supplement (doi:10.3390/cancers15123114), 2023-06-08
Supplement: s1 [file s1]

Supplementary Figure S1

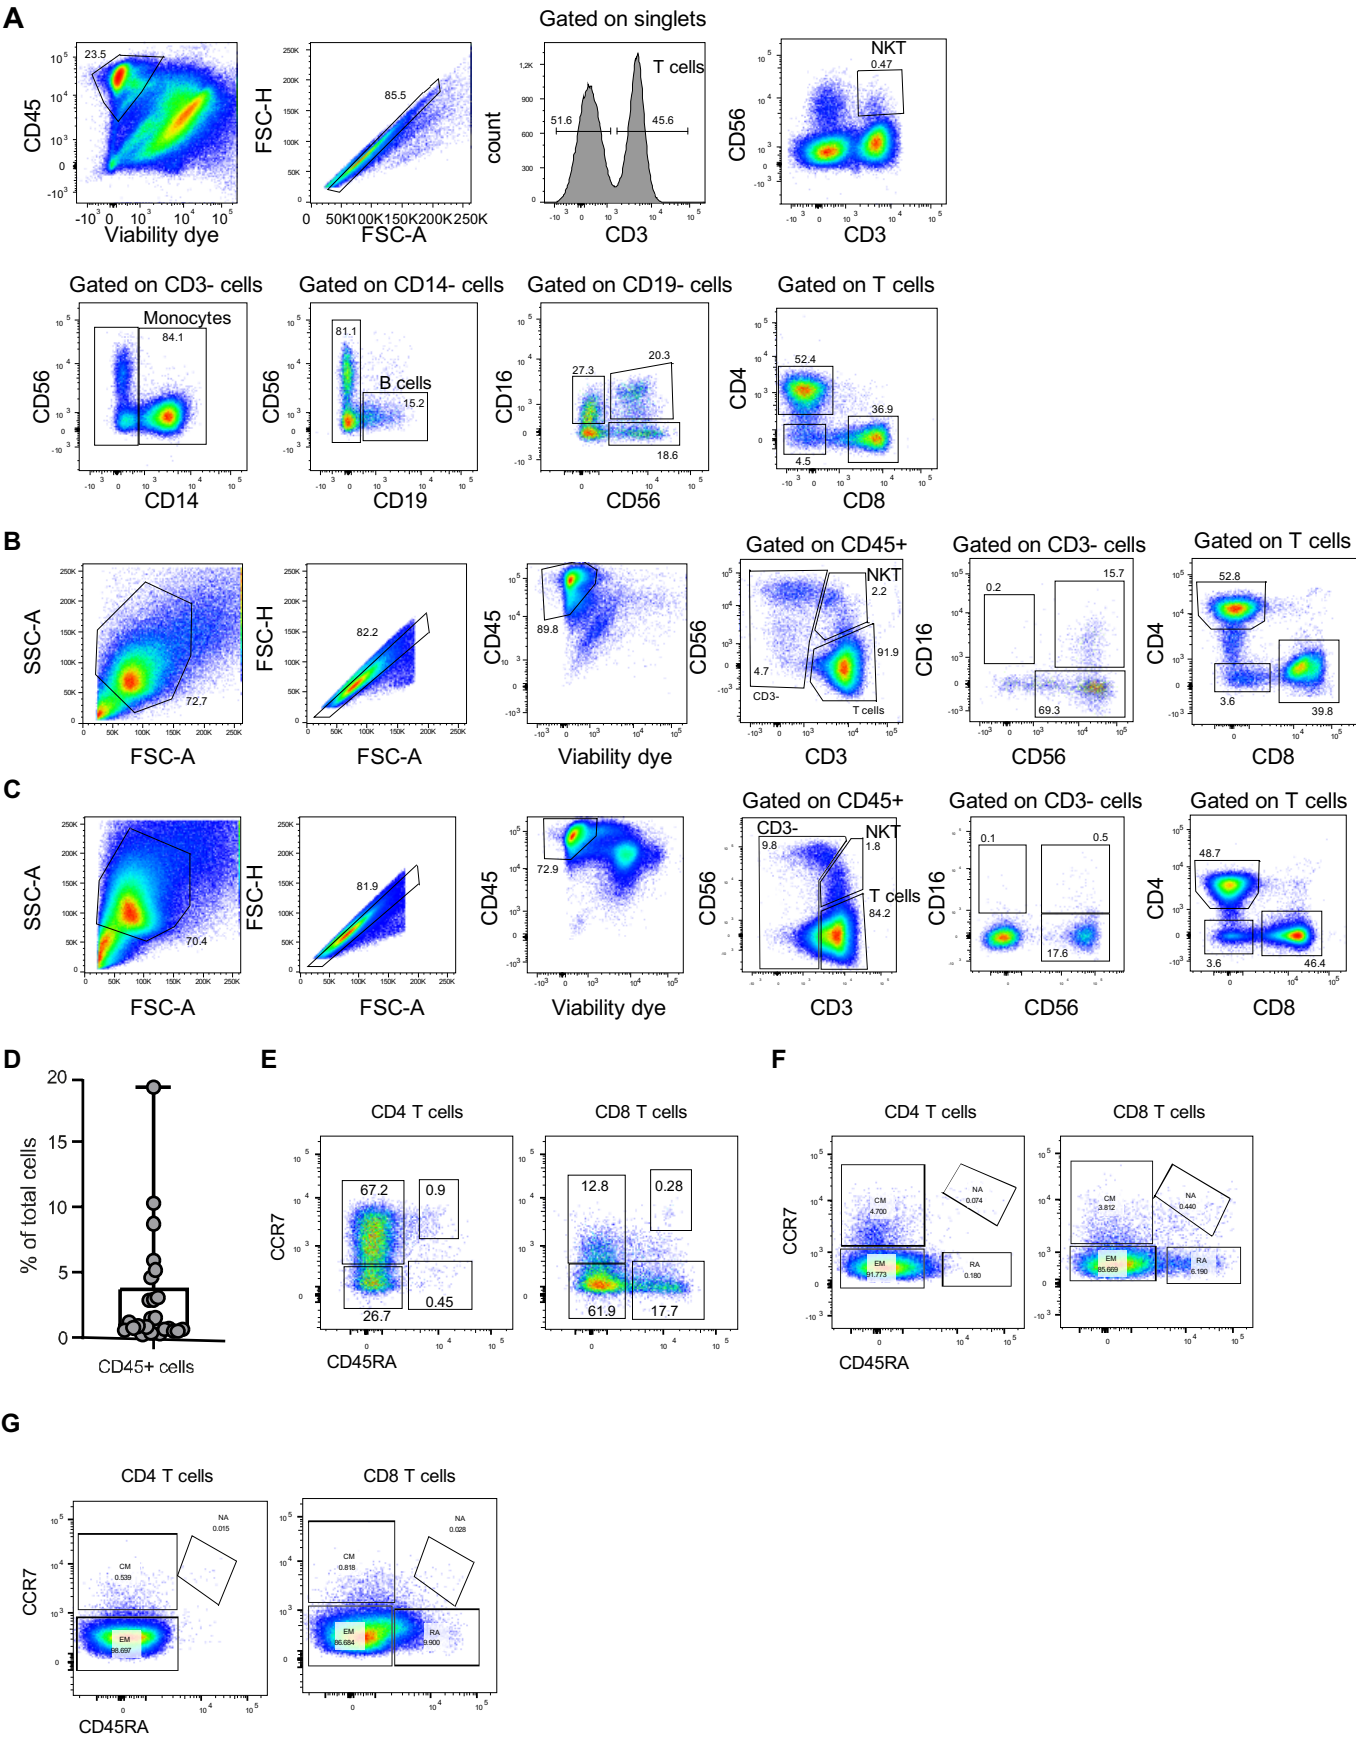

**Supplementary Figure S1. Phenotypic characterization of lymphocytes infiltrating the prostate tissue.**

Gating strategy for the quantification of the populations composing the prostate infiltrating lymphocytes (PILs) measured **(a)** *ex vivo*, **(b)** after IL-2 amplification (Pre-REP) and **(c)** after rapid expansion protocol (REP). **(d)** *Ex vivo* frequency of CD45<sup>+</sup> cells among the total live cells derived from prostate tissue digestion. Representative flow cytometry examples of the differentiation profile (CCR7 and CD45RA expression) of CD4<sup>+</sup> and CD8<sup>+</sup> T cells measured in PILs **(e)** *ex vivo*, **(f)** after Pre-REP, **(g)** after REP.

Supplementary Figure S2

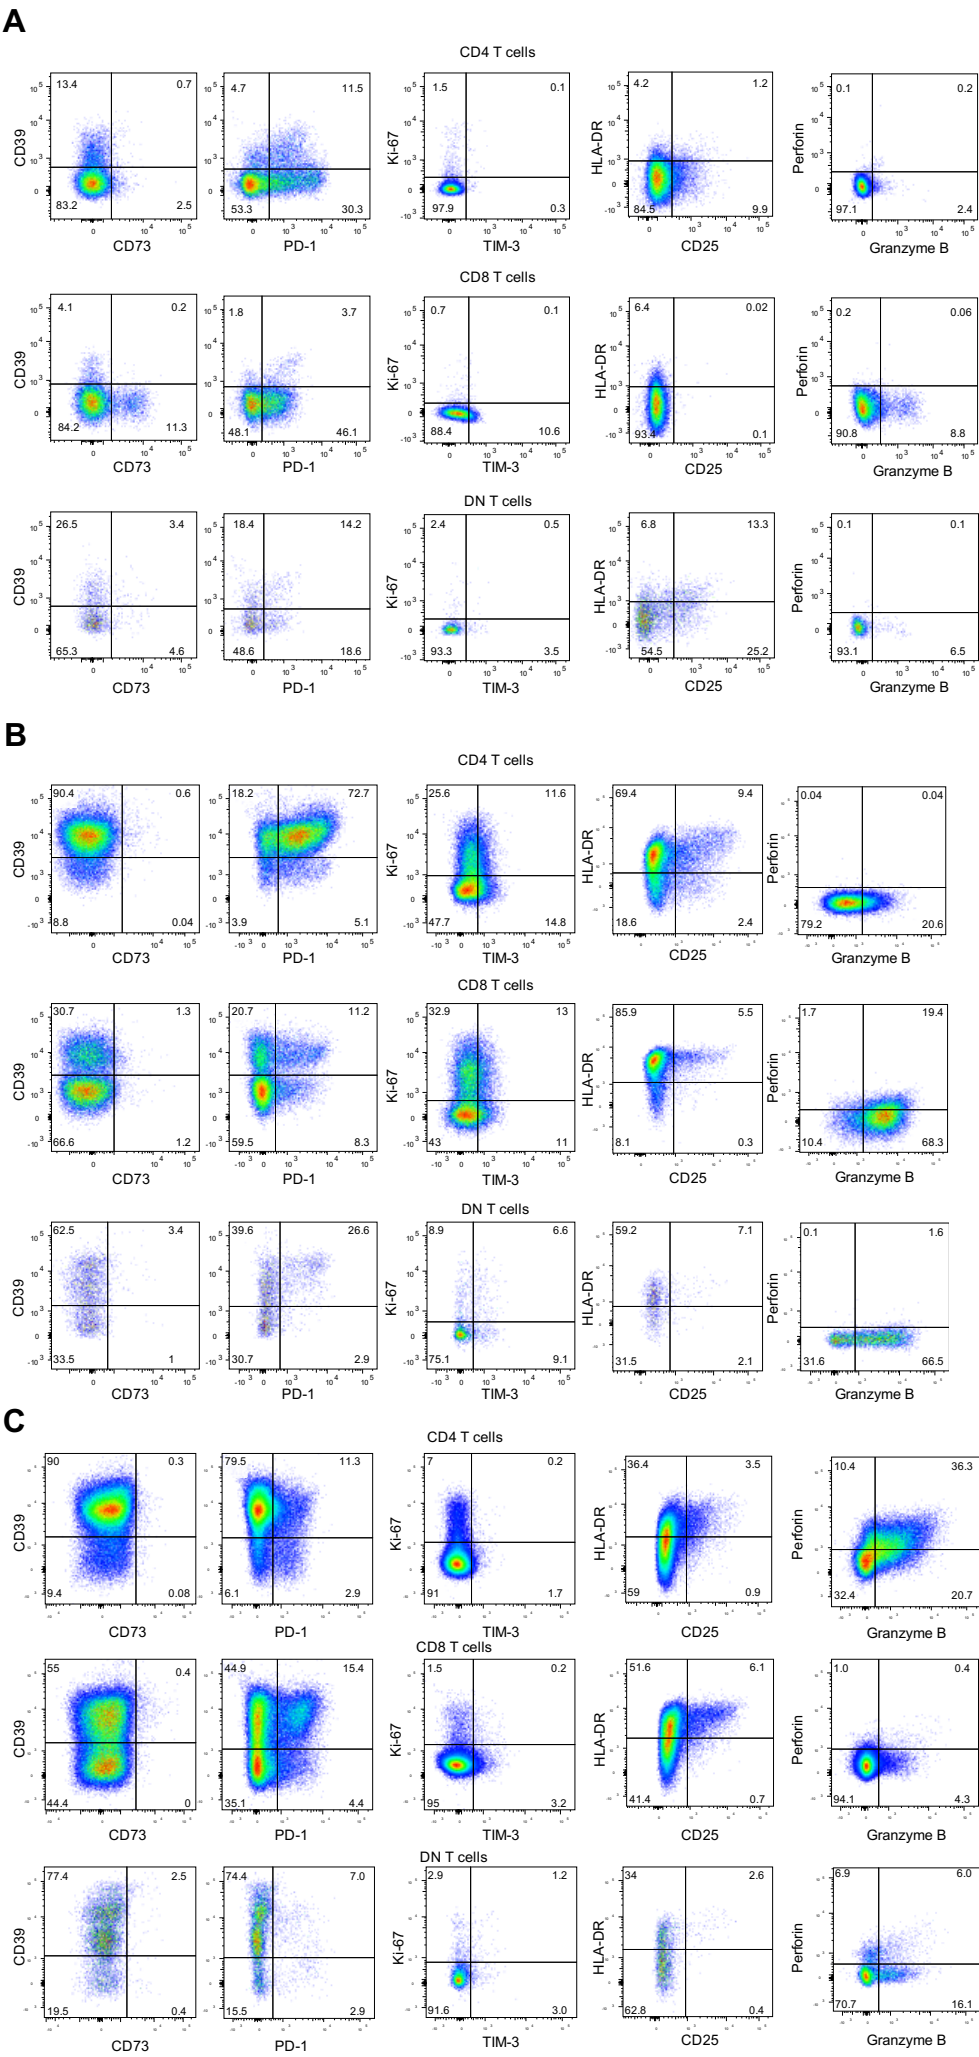

**Supplementary Figure S2. Expression of activation/exhaustion markers in prostate infiltrating lymphocytes.**

Representative flow cytometry examples of the expression of activation/exhaustion markers in CD4<sup>+</sup>, CD8<sup>+</sup> and DN (double negative) T cells from prostate infiltrating lymphocytes (PILs) **(a)** *ex vivo*, **(b)** after IL-2 amplification (Pre-REP) and **(c)** after rapid expansion protocol (REP).

Supplementary Figure S3

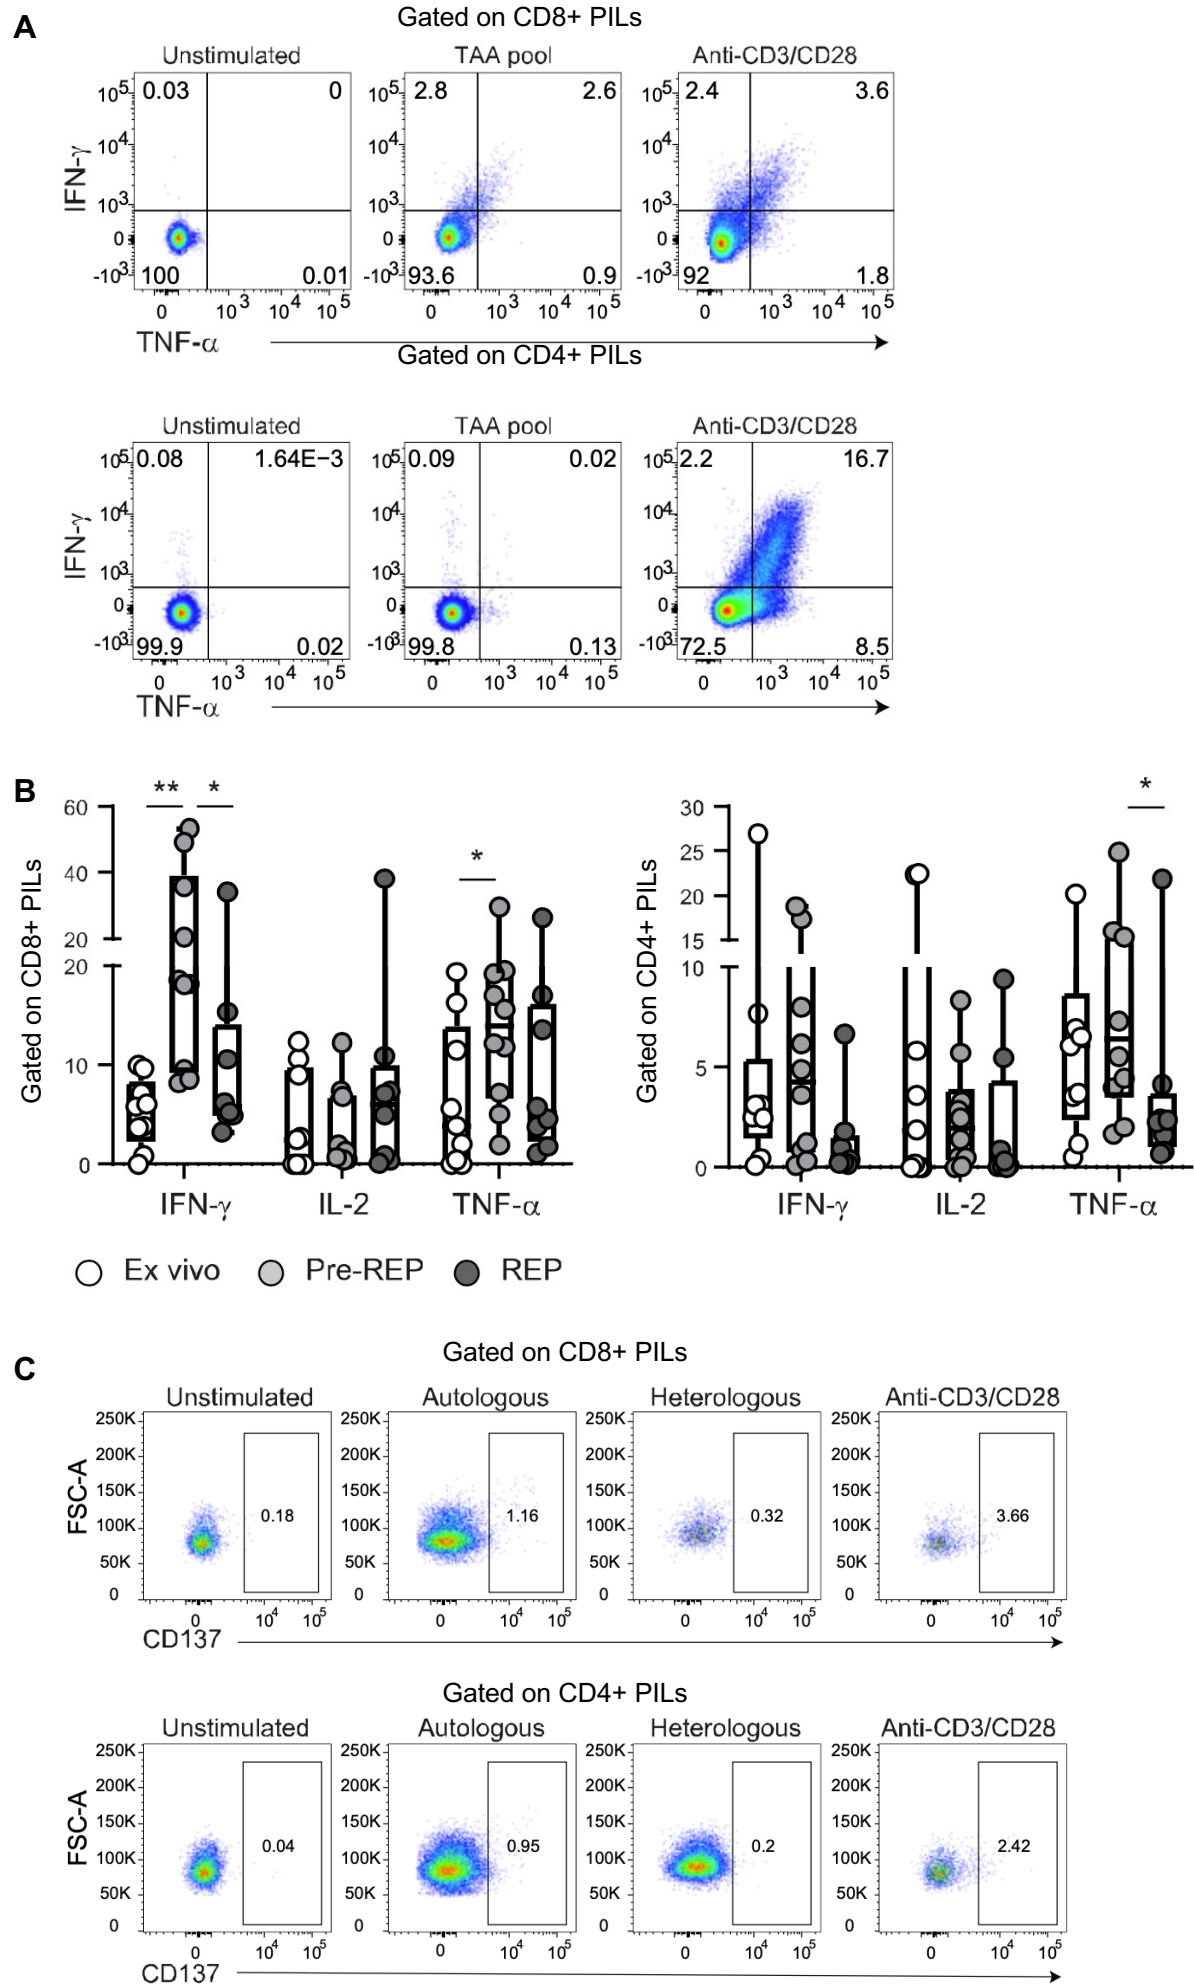

**Supplementary Figure S3. T cells infiltrating prostate tissue responses to TAA and prostate tissues.**

**(a)** Representative example of the response to tumor-associated antigens (TAA) or anti-CD3/CD28 stimulation by CD8<sup>+</sup> and CD4<sup>+</sup> IL-2 expanded (Pre-REP) prostate infiltrating lymphocytes (PILs). **(b)** Cumulative data of the anti-CD3/CD28 induced response in CD8<sup>+</sup> (left graph) and CD4<sup>+</sup> (right graph) PILs measured ex vivo (white dots), after Pre-REP (grey dots) and after REP (black dots). Kruskal-Wallis tests. \**p* < 0.05, \*\**p* < 0.01. **(c)** Representative example of the response to autologous or heterologous tissue or to anti-CD3/CD28 stimulation by CD8<sup>+</sup> and CD4<sup>+</sup> REP expanded PILs quantified by CD137 expression.

**Supplementary Table S1. Composition of pools for PSCA, PSA, PSMA and PAP proteins**

| <b>9-10 aminoacids peptides (HLA-A2)</b> |            |
|------------------------------------------|------------|
| <b>Pool PSCA</b>                         | ALLMAGLAL  |
|                                          | ALQPGTALL  |
|                                          | LLCYSCKAQV |
| <b>Pool PSA</b>                          | VLVHPQWVL  |
|                                          | KLQCVDLHV  |
|                                          | FLTPKKLQCV |
|                                          | VISNDVCAQV |
| <b>Pool PSMA</b>                         | LLHETDSAV  |
|                                          | VLAGGFLL   |
|                                          | LLQERGVAYI |
|                                          | MMNDQLMFL  |
| <b>Pool PAP</b>                          | FLFLLFFWL  |
|                                          | TLMSAMTNL  |
|                                          | ALDVYNGLL  |

**Supplementary Table S2. Composition of pools containing 10 aminoacids peptides encompassing the 5T4 protein**

| Sequences (206 peptides) |             |            |            |            |            |             |
|--------------------------|-------------|------------|------------|------------|------------|-------------|
| MPGGCSRGP                | AQPCALCECSE | AALNLSGSRL | NHIVPPEDER | LSNNSLVSLT | HMADMVTWLK | IVLALIGAIF  |
| GGCSRGPAA                | PALCECSEAA  | LNLSGSRLDE | IVPPEDERQN | NNSLVSLTYV | ADMVTWLKET | LALIGAIFLL  |
| CSRGPAAAG                | LCECSEAART  | LSGSRLDEV  | PPEDERQNRS | SLVSLTYVSF | MVTWLKETEV | LIGAIFLLVL  |
| RGPAAGDGRL               | ECSEAARTVK  | GSRLDEV    | EDERQNRSFE | VSLTYVSFRN | TWLKETEVVQ | GAIFLLVLYL  |
| PAAGDGRLRL               | SEAARTVKCV  | RLDEV      | ERQNRSFEGM | LTYVSFRNLT | LKETEVVQGK | IFLLVLYLNR  |
| AGDGRLRLAR               | AARTVKCVNR  | DEV        | QNRSFEGMVV | YVSFRNLTHL | ETEVVQGKDR | LLVLYLNRKG  |
| DGRLRLARLA               | RTVKCVNRNL  | VRAGAFELP  | RSFEGMVVAA | SFRNLTHLES | EVVQGKDRLT | VLYLNRKGIK  |
| RLRLARLALV               | VKCVNRNLTE  | AGAFELPSL  | FEGMVVAALL | RNLTHLESLH | VQGKDRLTCA | YLNKGIKKW   |
| RLARLALVLL               | CVNRNLTEVP  | AFEHLPSLRQ | GMVVAALLAG | LTHLESLHLE | GKDRLTCAYP | NRKGIKKWMH  |
| ARLALVLLGW               | NRNLTEVPTD  | EHLPSLRQLD | VVAALLAGRA | HLESLHLEDN | DRLTCAYPEK | KGKIKWMHNI  |
| LALVLLGWVS               | NLTEVPTDLP  | LPSLRQLDLS | AALLAGRALQ | ESLHLEDNAL | LTCAYPEKMR | IKKWMHNIIRD |
| LVLLGWVSSS               | TEVPTDLPAY  | SLRQLDLSHN | LLAGRALQGL | LHLEDNALKV | CAYPEKMRNR | KWMHNIIRDAC |
| LLGWVSSSSP               | VPTDLPAYVR  | RQLDLSHNPL | AGRALQGLRR | LEDNALKVLH | YPEKMRNRVL | MHNIIRDACRD |
| GWVSSSSPTS               | TDLPAYVRNL  | LDLSHNPLAD | RALQGLRRLE | DNALKVLHNG | EKMRNRVLLE | NIRDACRDHM  |
| VSSSSPTSSA               | LPAYVRNLFL  | LSHNPLADLS | LQGLRRLELA | ALKVLHNGTL | MRNRVLLELN | RDACRDHMEG  |
| SSSPTSSASS               | AYVRNLFLTG  | HNPLADLSPF | GLRRLELASN | KVLHNGTLAE | NRVLLELNSA | ACRDHMEGYH  |
| SPTSSASSFS               | VRNLFLTGNQ  | PLADLSPFAF | RRLELASNHF | LHNGTLAELQ | VLELNSADL  | RDHMEGYHYR  |
| TSSASSFSSS               | NLFLTGNQLA  | ADLSPFAFSG | LELASNHFLY | NGTLAELQGL | LELNSADLDC | HMEGYHYRYE  |
| SASSFSSSAP               | FLTGNQLAVL  | LSPFAFSGSN | LASNHFYLP  | TLAELQGLPH | LNSADLDCDP | EGYHYRYEIN  |
| SSFSSSAPFL               | TGNQLAVLPA  | PFAFSGSNAS | SNHFYLP    | AELQGLPHIR | SADLDCDPIL | YHYRYEINAD  |
| FSSSAPFLAS               | NQLAVLPAGA  | AFSGSNASVS | HFLYLP     | LQGLPHIRVF | DLDCDPILPP | YRYEINADPR  |
| SSAPFLASAV               | LAVLPAGAF   | SGSNASVSAP | LYLP       | GLPHIRVFLD | DCDPILPPSL | YEINADPRLT  |
| APFLASAVSA               | VLPAGAFARR  | SNASVSAPSP | LPRDVL     | PHIRVFLDNN | DPILPPSLQT | INADPRLTNL  |
| FLASAVSAQP               | PAGAFARRPP  | ASVSAPSPLV | RDVL       | IRVFLDNNPW | ILPPSLQTSY | ADPRLTNLSS  |
| ASAVSAQPPL               | GAFARRPPLA  | VSAPSPLVEL | VLAQLPSLRH | VFLDNNPWVC | PPSLQTSYVF | PRLTNLSSNS  |
| AVSAQPPLPD               | FARRPPLAEL  | APSPLVELIL | AQLPSLRHLD | LDNNPWVCD  | SLQTSYVFLG | LTNLSSNSDV  |
| SAQPPLPDQC               | RRPPLAELAA  | SPLVELILNH | LPSLRHLDLS | NNPWVCDCHM | QTSYVFLGIV |             |
| QPPLPDQCPA               | PPLAELAAALN | LVELILNHIV | SLRHLDSN   | PWVCDCHMAD | SYVFLGIVLA |             |
| PLPDQCPALC               | LAELAAALNLS | ELILNHIVPP | RHLDSNNSL  | VCDCHMADMV | VFLGIVLALI |             |
| PDQCPALCEC               | ELAALNLSGS  | ILNHIVPPED | LDLSNNSLV  | DCHMADMVTW | LGIVLALIGA |             |

**Supplementary Table S3. Composition of pools containing 15 aminoacids peptides encompassing the 5T4 protein**

| Sequences (82 peptides) |                  |
|-------------------------|------------------|
| MPGGCSRGPAAGDGR         | GRALQGLRRLELASN  |
| SRGPAAGDGRLRLAR         | GLRRLELASNHFLYL  |
| AGDGRLRLARLALVL         | ELASNHFLYLPRDVL  |
| LRLARLALVLLGWVS         | HFLYLPRDVLAQLPS  |
| LALVLLGWVSSSSPT         | PRDVLAQLPSLRHLD  |
| LGWVSSSSPTSSASS         | AQLPSLRHLDLSNNS  |
| SSSPTSSASSFSSSA         | LRHLDLSNNSLVSLT  |
| SSASSFSSSAPFLAS         | LSNNSLVSLTYVSFR  |
| FSSSAPFLASAVSAQ         | LVSLTYVSFRNLTHL  |
| PFLASAVSAQPPLPD         | YVSFRNLTHLESLHL  |
| AVSAQPPLPDQCPAL         | NLTHLESLHLEDNAL  |
| PPLPDQCPALCECSE         | ESLHLEDNALKVLHN  |
| QCPALCECSEAARTV         | EDNALKVLHNGTLAE  |
| CECSEAARTVKCVNR         | KVLHNGTLAEQGLP   |
| AARTVKCVNRNLTEV         | GTLAELQGLPHIRVF  |
| KCVNRNLTEVPTDLP         | LQGLPHIRVFLDNNP  |
| NLTEVPTDLPAYVRN         | HIRVFLDNNPWV CDC |
| PTDLPAYVRNLFLTG         | LDNNPWVCDCHMADM  |
| AYVRNLFLTGNQLAV         | WVCDCHMADMVTWLK  |
| LFLTGNQLAVLPAGA         | HMADMVTWLKETEVV  |
| NQLAVLPAGAFARRP         | VTWLKETEVVQGKDR  |
| LPAGAFARRPPLAEL         | ETEVVQGKDRLTCAY  |
| FARRPPLAELAALNL         | QGKDRLTCAYPEKMR  |
| PLAELAALNLSGSRL         | LTCAYPEKMRNRVLL  |
| AALNLSGSRLDEVRA         | PEKMRNRVLELNSA   |
| SGSRLDEV RAGAFE OH      | NRVLELNSADLDCD   |
| DEV RAGAFEHLPSLR        | ELNSADLDCDPILPP  |
| GAFEHLPSLRQLDLS         | DLDCDPILPPSLQTS  |
| LPSLRQLDLSHNPLA         | PILPPSLQTSYVFLG  |
| QLDLSHNPLADLSPF         | SLQTSYVFLGIVLAL  |
| HNPLADLSPFAFSGS         | YVFLGIVLALIGAIF  |
| DLSPFAFSGSNASVS         | IVLALIGAIFLLVLY  |
| AFSGSNASVSAPSPL         | IGAIFLLVLYLNRKG  |
| NASVSAPSPLVELIL         | LLVLYLNRKGIKKWM  |
| APSPLVELILNHIVP         | LNRKGIKKWMHNIRD  |
| VELILNHIVPPEDER         | IKKWMHNIRDACRDOH |
| NHIVPPEDERQNRSF         | HNIRDACRDHMEGYOH |
| PEDERQNRSFEGMVV         | ACRDHMEGYHYRYEI  |
| QNRSFEGMVVAALLA         | MEGYHYRYEINADPR  |
| EGMVVAALLAGRALQ         | YRYEINADPRLTNLS  |
| AALLAGRALQGLRRL         | NADPRLTNLSNSDV   |
